# Supplementary material for: Personality Traits and Career Role Enactment: Career Role Preferences as a Mediator
Source: Front Psychol. 2019 Jul 25;10:1720. doi: 10.3389/fpsyg.2019.01720 (PMC6671867; doi:10.3389/fpsyg.2019.01720)
Supplement: Supplementary file 9 [file Table_9.docx]

Table A9

*Study 2 Descriptives and Correlations of Variables.*

| Variable | 1 | 2 | 3 | 4 | 5 | 6 | 7 | 8 | 9 | 10 | 11 | 12 | 13 | 14 | 15 | 16 | 17 | 18 | 19 | 20 | 21 | 22 |
| --- | --- | --- | --- | --- | --- | --- | --- | --- | --- | --- | --- | --- | --- | --- | --- | --- | --- | --- | --- | --- | --- | --- |
| 1 Age | 1 |  |  |  |  |  |  |  |  |  |  |  |  |  |  |  |  |  |  |  |  |  |
| 2 Sex*a* | -.08 | 1 |  |  |  |  |  |  |  |  |  |  |  |  |  |  |  |  |  |  |  |  |
| 3 Education*b* | -.19* | .04 | 1 |  |  |  |  |  |  |  |  |  |  |  |  |  |  |  |  |  |  |  |
| 4 Job zone*c* | -.14* | -.09 | .39** | 1 |  |  |  |  |  |  |  |  |  |  |  |  |  |  |  |  |  |  |
| 5 Employment | .52* | -.07 | -.28** | -.13* | 1 |  |  |  |  |  |  |  |  |  |  |  |  |  |  |  |  |  |
| *Career Roles* |  |  |  |  |  |  |  |  |  |  |  |  |  |  |  |  |  |  |  |  |  |  |
| 6 Enactment Maker | -.05 | .21** | -.10 | -.17** | -.09 | 1 |  |  |  |  |  |  |  |  |  |  |  |  |  |  |  |  |
| 7 Expert | -.05 | -.04 | .08 | .06 | -.09 | .28** | 1 |  |  |  |  |  |  |  |  |  |  |  |  |  |  |  |
| 8 Presenter | -.05 | -.01 | .07 | -.01 | -.09 | .34** | .23** | 1 |  |  |  |  |  |  |  |  |  |  |  |  |  |  |
| 9 Guide | .06 | .14* | .00 | -.03 | -.04 | .29** | .06 | .58** | 1 |  |  |  |  |  |  |  |  |  |  |  |  |  |
| 10 Director | .07 | -.05 | .12 | .07 | -.15** | .28** | .07 | .67** | .58** | 1 |  |  |  |  |  |  |  |  |  |  |  |  |
| 11 Inspirer | .09 | .12* | -.06 | -.10 | -.13* | .39** | .12* | .70** | .68** | .62** | 1 |  |  |  |  |  |  |  |  |  |  |  |
| 12 Preferences Maker | .04 | .12* | -.06 | -.13* | .01 | .35** | .07 | .07 | .03 | -.02 | .08 | 1 |  |  |  |  |  |  |  |  |  |  |
| 13 Expert | .02 | -.06 | .09 | .05 | .01 | .09 | .49** | -.08 | -.10 | -.13* | -.09 | .43** | 1 |  |  |  |  |  |  |  |  |  |
| 14 Presenter | -.03 | .09 | .02 | -.03 | -.13* | .21** | .16** | .43** | .35** | .36** | .43** | .38** | .30** | 1 |  |  |  |  |  |  |  |  |
| 15 Guide | .07 | .13* | .01 | -.01 | -.06 | .11 | .07 | .16** | .44** | .12* | .28** | .37** | .35** | .58** | 1 |  |  |  |  |  |  |  |
| 16 Director | .07 | -.08 | .07 | .07 | -.08 | .22** | .03 | .39** | .33** | .53 | .38** | .38** | .29** | .64** | .45** | 1 |  |  |  |  |  |  |
| 17 Inspirer | .08 | -.02 | .06 | .02 | -.13* | .15* | .17** | .41** | .39** | .40 | .49** | .38** | .41** | .79** | .65** | .71** | 1 |  |  |  |  |  |
| *Individual Differences* |  |  |  |  |  |  |  |  |  |  |  |  |  |  |  |  |  |  |  |  |  |  |
| 18 Extraversion | -.13* | .12* | -.09 | -.04 | -.17** | .22** | .09 | .45** | .47** | .34** | .53** | -.02 | -.17** | .48** | .28** | .28** | .37** | 1 |  |  |  |  |
| 19 Friendliness | .15* | .09 | -.09 | -.04 | -.01 | .19** | .04 | .24** | .47** | .12* | .34** | .09 | .01 | .15* | .44** | .11 | .23** | .23** | 1 |  |  |  |
| 20 Conscientiousness | -.01 | .21** | -.07 | -.16** | .02 | .54** | .20** | .14* | .15* | .04 | .14* | .31** | .23** | .11 | .03 | .09 | .02 | .03 | .19** | 1 |  |  |
| 21 Stability | .14* | -.31** | .00 | -.00 | -.00 | .13* | .03 | .21** | .16** | .26** | .17** | -.00 | .00 | .04 | -.04 | .23** | .13* | .14* | .09 | .01 | 1 |  |
| 22 Openness to experience | .09 | -.01 | -.05 | -.00 | -.09 | .28** | .39** | .38** | .41** | .32** | .41** | .06 | .24** | .23** | .20** | .27** | .42** | .31** | .34** | .19** | .25** | 1 |
| Mean | 41 | .46 | 4.02 | 3.82 | 7.68 | 72.84 | 64.91 | 63.38 | 71.73 | 59.74 | 65.43 | 5.08 | 4.95 | 4.19 | 4.96 | 4.43 | 4.69 | 64.85 | 70.81 | 72.19 | 60.24 | 77.72 |
| SD | 9.53 | .50 | .85 | .55 | 6.60 | 15.41 | 18.01 | 16.41 | 16.64 | 19.66 | 15.69 | 1.15 | 1.11 | 1.02 | 1.09 | 1.13 | 1.06 | 17.10 | 11.33 | 13.88 | 15.21 | 11.65 |

*Note. N* = 285, *a*Sex (0= men, 1= women), *b*education (1= preliminary school, 2= high school, 3 = intermediate vocational education, 4 = higher vocational education, 5= university degree), *c*job zone (1 = little or no preparation needed, 2 = some preparation needed, 3 = medium preparation needed, 4 = considerable preparation needed, 5 = extensive preparation needed). *p < .05 (two-tailed), **p < .01 (two-tailed).
